# Supplementary figures and images for: Assessment of the predictive accuracy of five in silico prediction tools, alone or in combination, and two metaservers to classify long QT syndrome gene mutations
Source: Springer Nature journal article supplement (doi:10.1186/s12881-015-0176-z), 2015-05-12

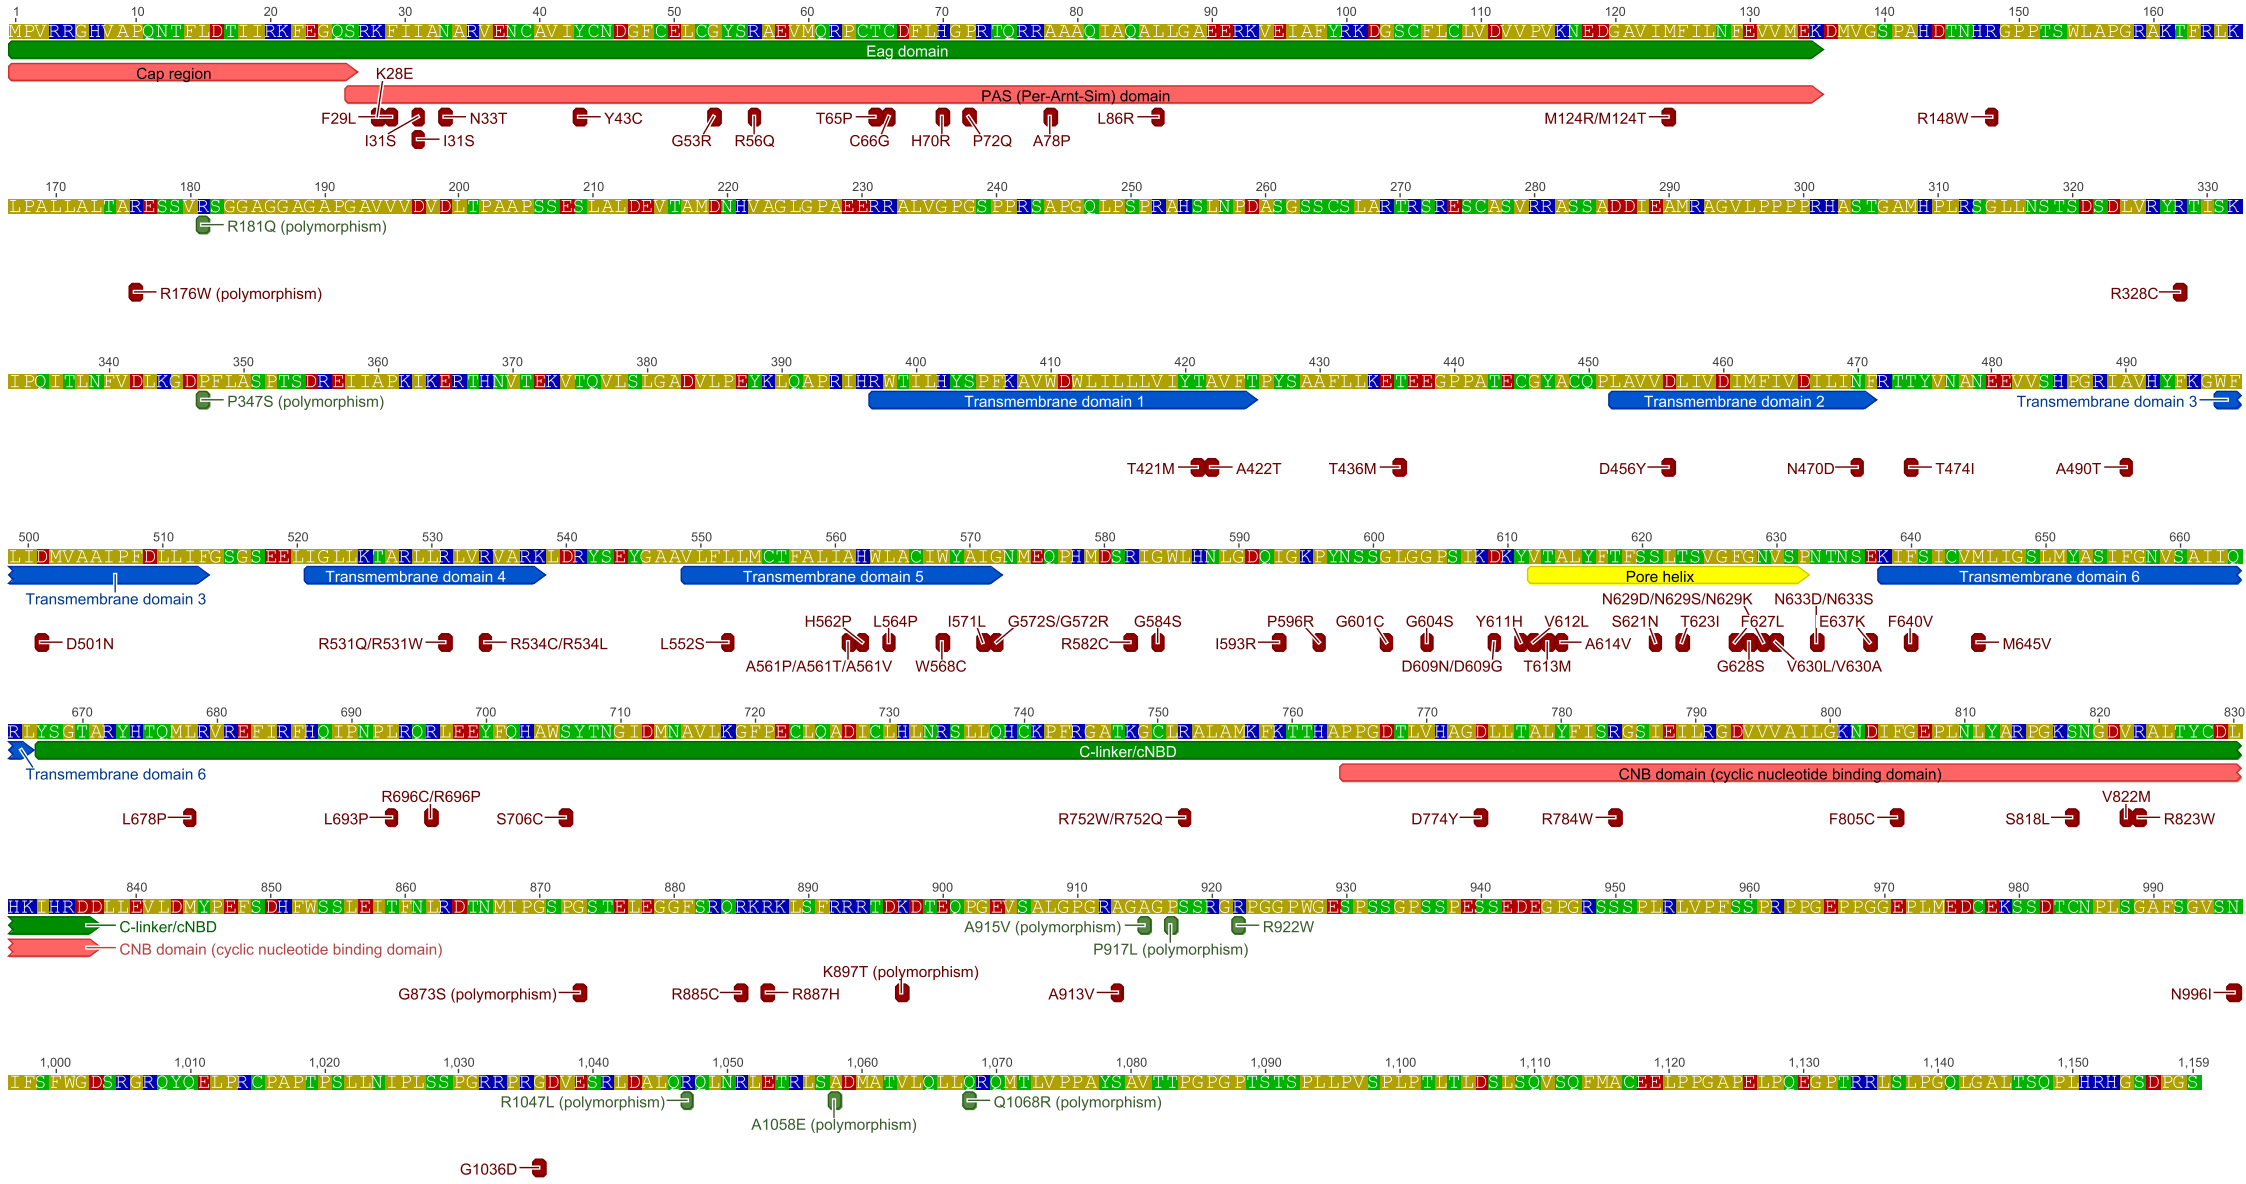

Supplement: MOESM2 [file 9741280]

## All genes

Pathogenic

Benign

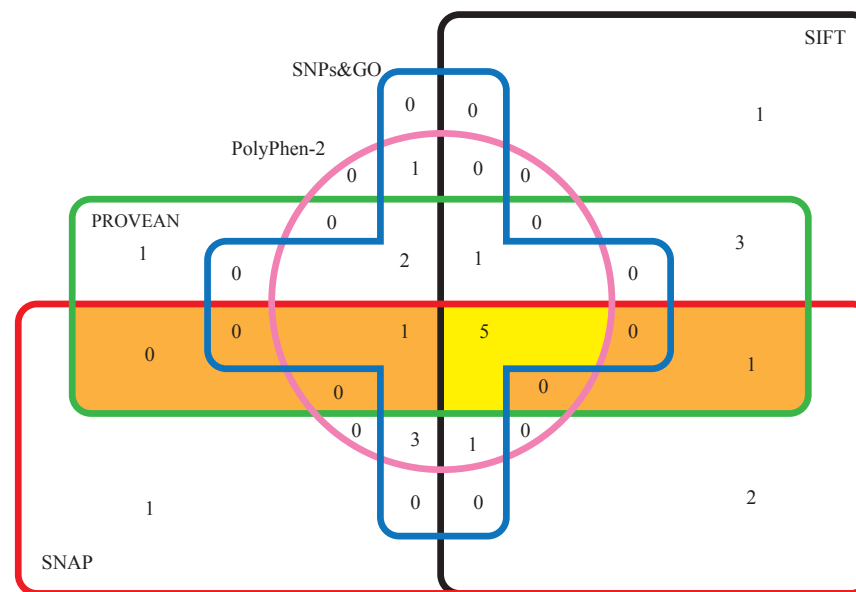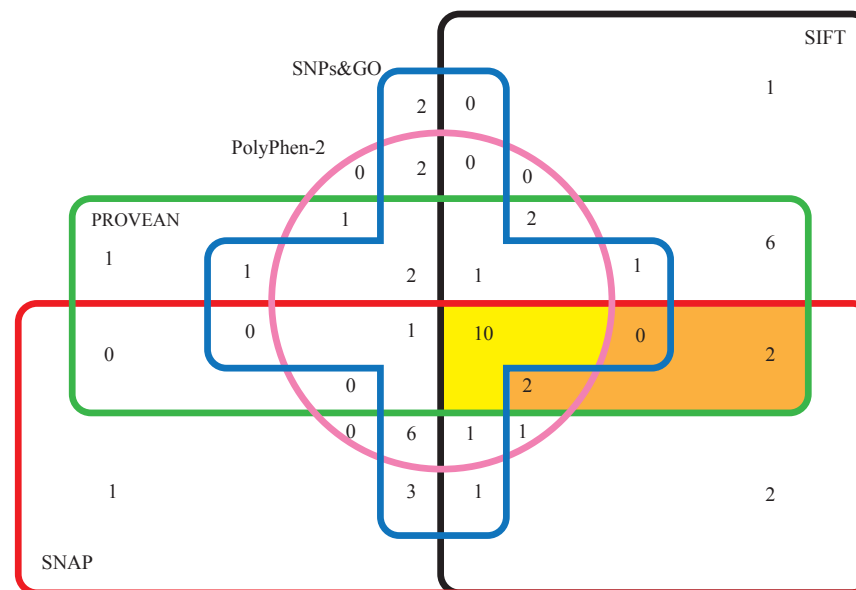

Supplement: MOESM2 [file 9741280]

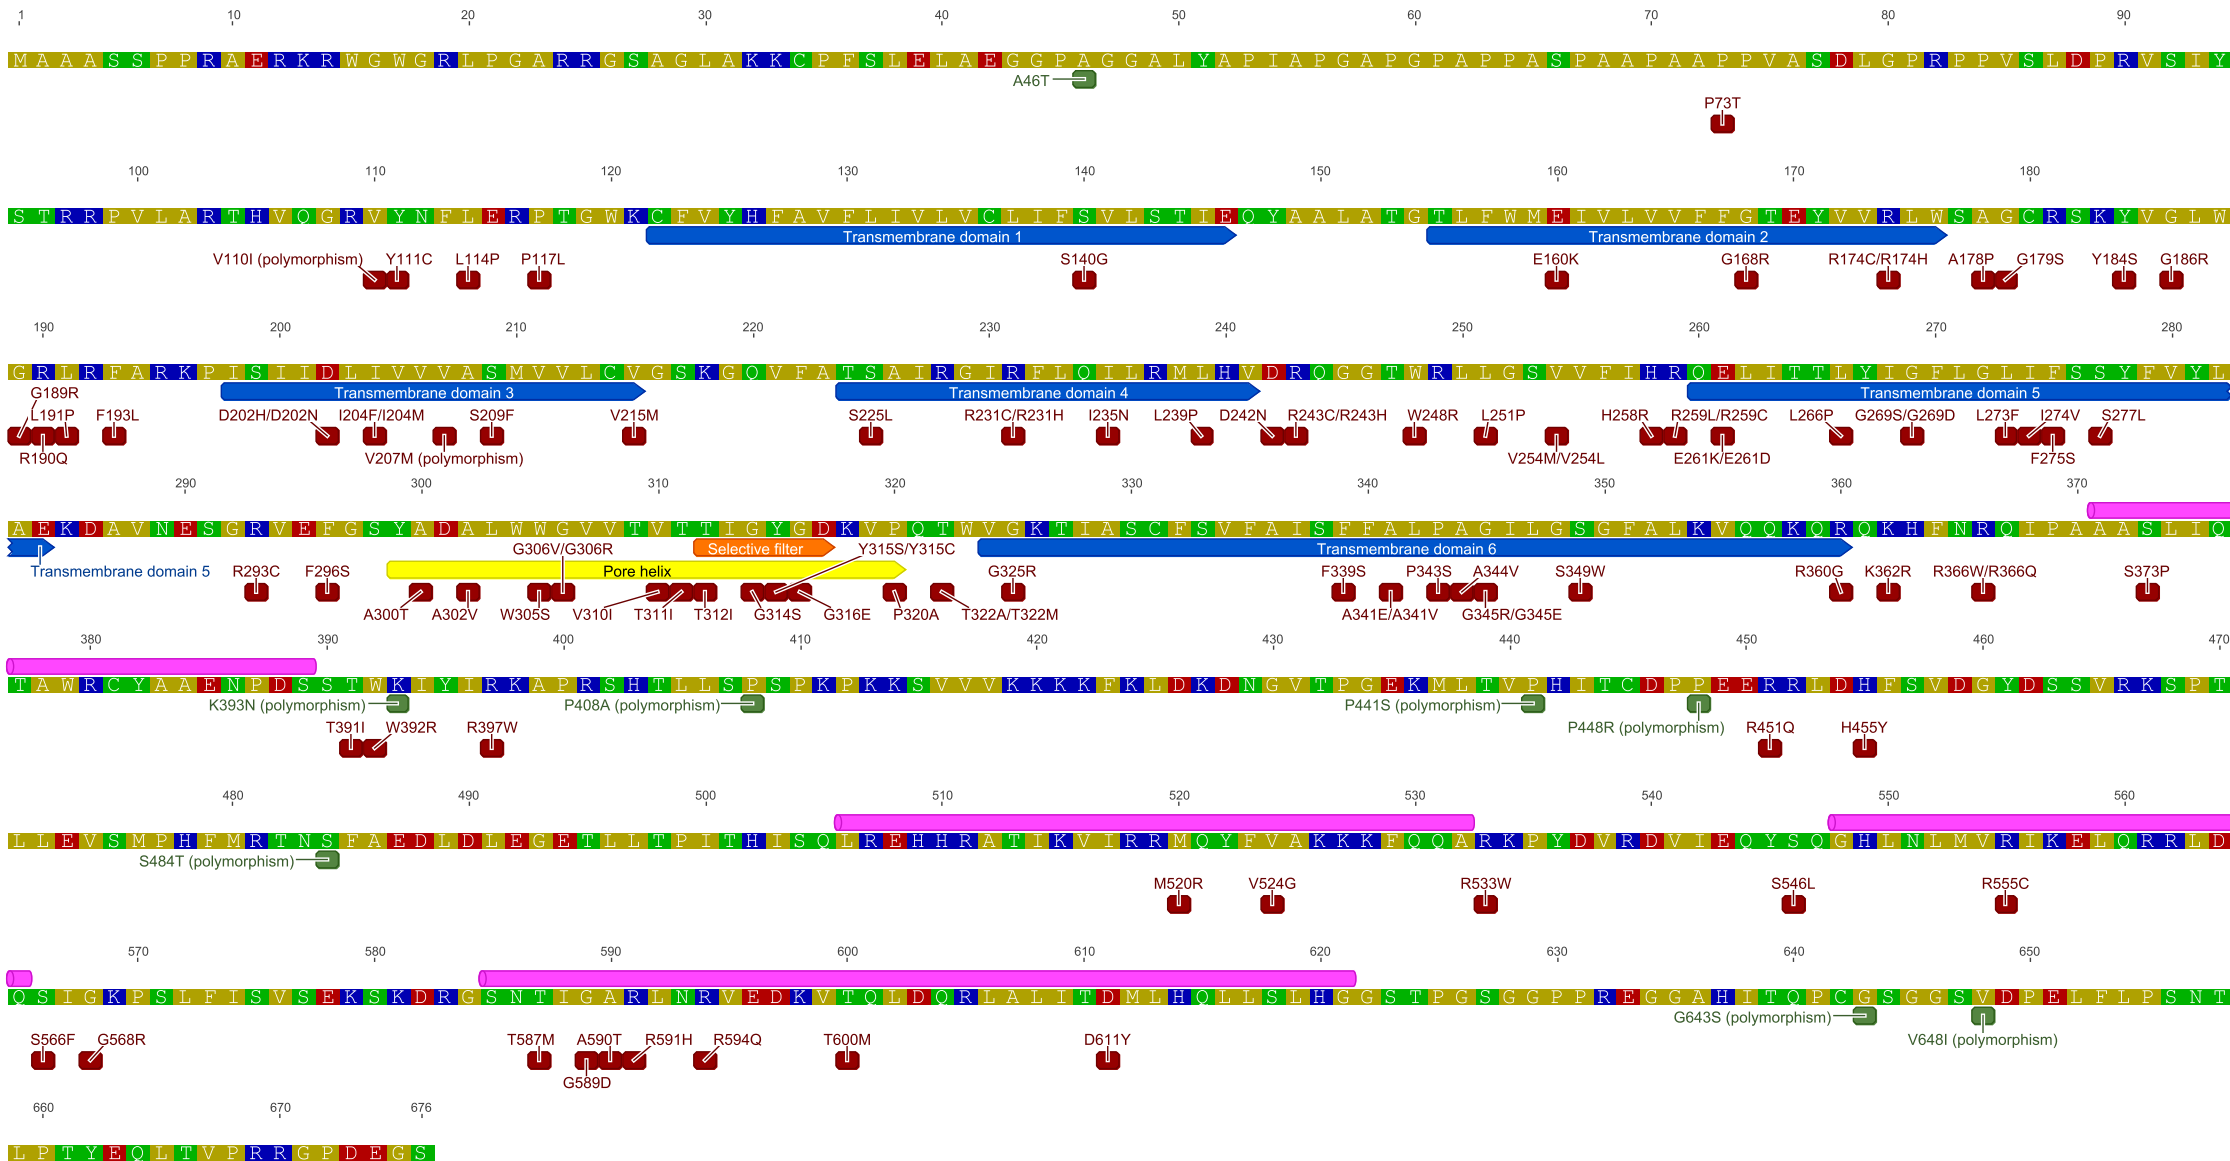

Supplement: MOESM2 [file 9741280]

*KCNH2*

Pathogenic

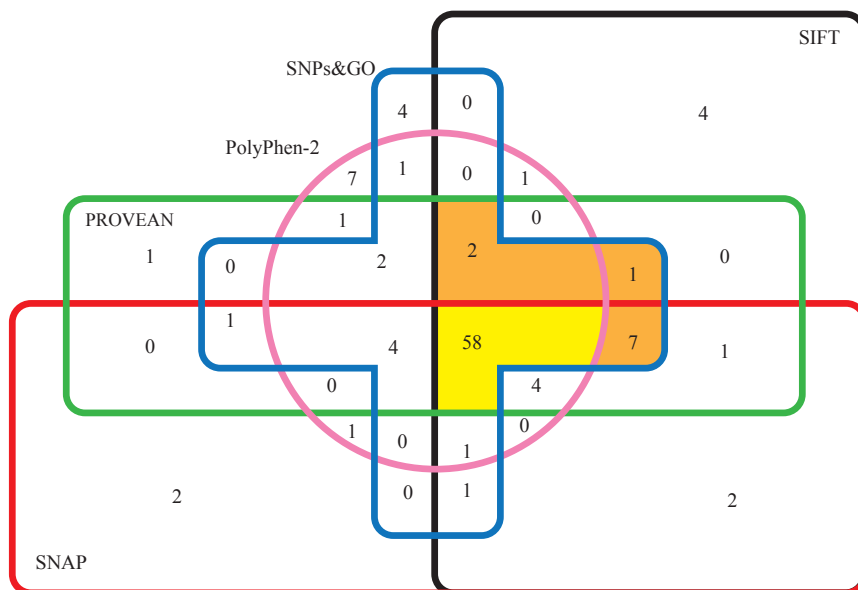

Benign

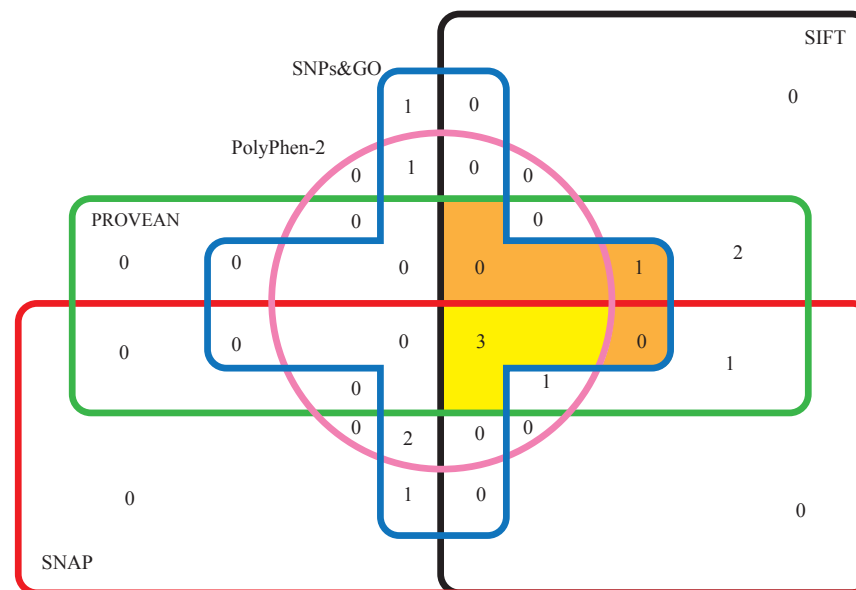

Supplement: MOESM2 [file 9741280]

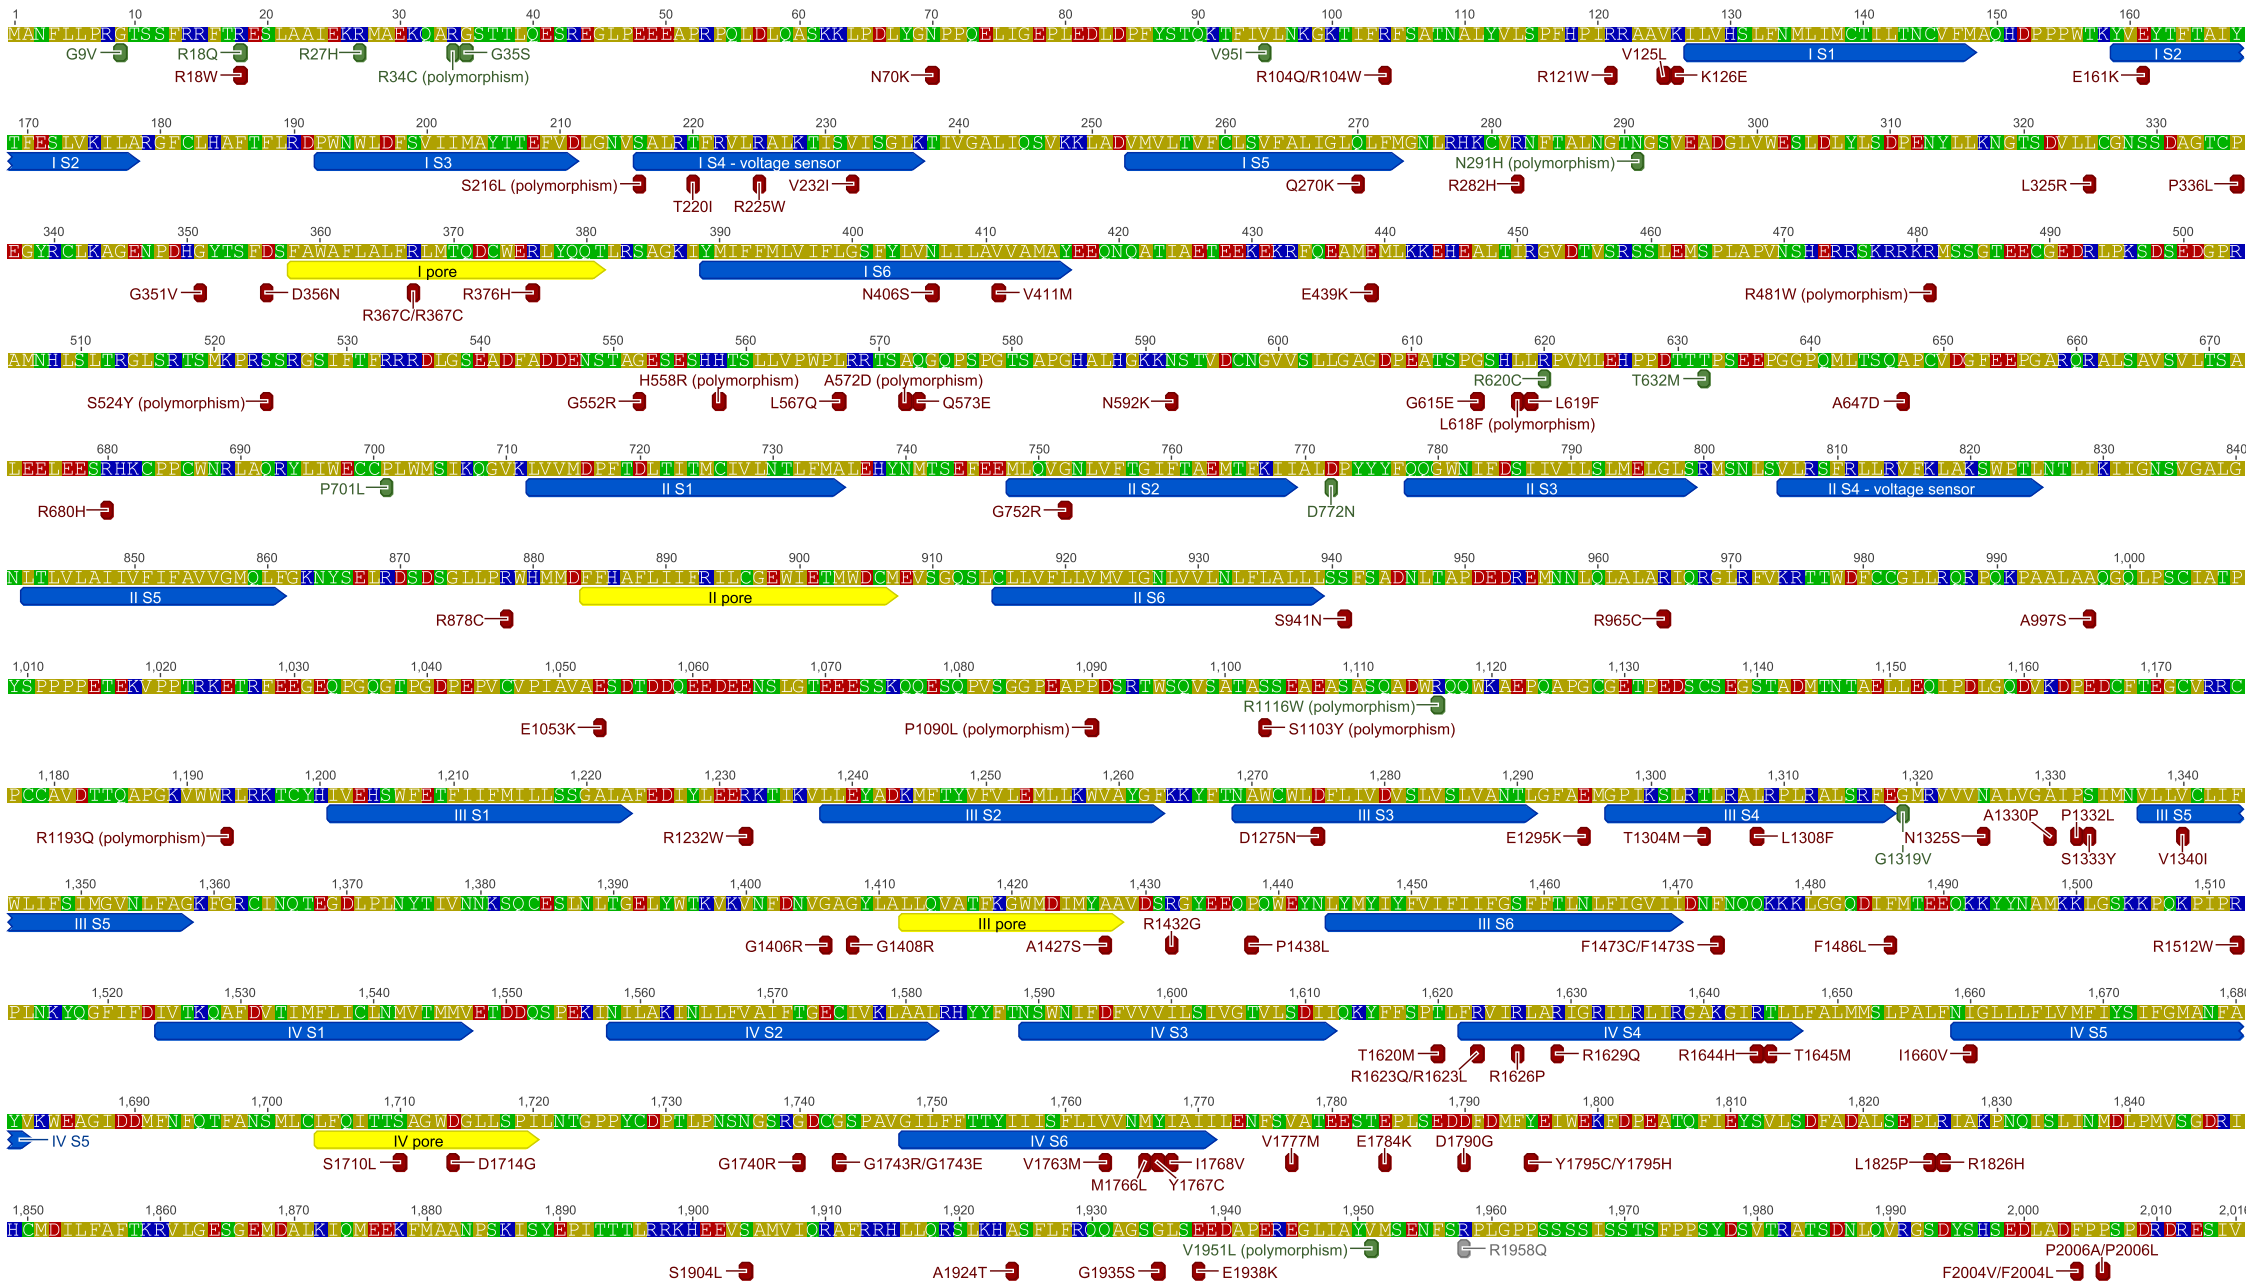

Supplement: MOESM2 [file 9741280]
